# Supplementary material for: Electrochemical and theoretical investigations of the reduction of [Fe2(CO)5L{µ-SCH2XCH2S}] complexes related to [FeFe] hydrogenase
Source: Royal Society of Chemistry journal article supplement (doi:10.1039/b709273c), 2007-01-01
Supplement: b709273c.pdf [file b709273c.pdf]

## Electronic Supplementary Information

### **Electrochemical and theoretical investigations of the reduction of $[\text{Fe}_2(\text{CO})_5\text{L}\{\mu\text{-SCH}_2\text{XCH}_2\text{S}\}]$ complexes related to $[\text{FeFe}]$ Hydrogenase.**

Jean-François Capon, Salah Ezzaher, Frédéric Gloaguen, François Y. Pétilon, Philippe Schollhammer, Jean Talarmin\*

UMR CNRS 6521 « Chimie, Electrochimie Moléculaires et Chimie Analytique »

UFR Sciences et Techniques, Université de Bretagne Occidentale, CS 93837, 29238 Brest-Cedex 3, France.

Thomas Davin, John E. McGrady\* and Kenneth W. Muir

WestCHEM, Department of Chemistry, University of Glasgow, Glasgow G12 8QQ, United Kingdom.

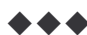

**Figure S1** : Cyclic voltammetry of  $[\text{Fe}_2(\text{CO})_6\{\mu\text{-SCH}_2\text{N}(\text{iPr})\text{CH}_2\text{S}\}]$  **1b** (1 mM) under Ar in MeCN- $[\text{NBu}_4][\text{PF}_6]$  ( $\nu = 0.2 \text{ V s}^{-1}$ ; vitreous carbon electrode; potentials are in V vs  $\text{Fc}^+/\text{Fc}$ ).

**Figure S2** : Scan rate dependence of the current function for the reduction of  $[\text{Fe}_2(\text{CO})_6\{\mu\text{-S}(\text{CH}_2)_3\text{S}\}]$  **2** (1.4 mM) under Ar and under CO in MeCN- $[\text{NBu}_4][\text{PF}_6]$  (vitreous carbon electrode).

**Figure S3** : Cyclic voltammetry of  $[\text{Fe}_2(\text{CO})_6\{\mu\text{-SCH}_2\text{N}(\text{iPr})\text{CH}_2\text{S}\}]$  **1b** (1 mM) at different scan rates under Ar in MeCN- $[\text{NBu}_4][\text{PF}_6]$  (vitreous carbon electrode; potentials are in V vs  $\text{Fc}^+/\text{Fc}$ ).

**Figure S4** : Cyclic voltammetry of complexes a) **1a** and b) **2** in MeCN- $[\text{NBu}_4][\text{PF}_6]$  under CO at different scan rates (vitreous carbon electrode; potentials are in V vs  $\text{Fc}^+/\text{Fc}$ ).

**Figure S5** : Cyclic voltammetry of **3a** (a) under Ar, and (b) under CO in thf- $[\text{NBu}_4][\text{PF}_6]$  (vitreous carbon electrode;  $\nu = 0.2 \text{ Vs}^{-1}$ ; potentials are in V vs  $\text{Fc}^+/\text{Fc}$ ).

**Figure S6** : Cyclic voltammetry of **3a** (a) under Ar, and (b) under CO in  $\text{CH}_2\text{Cl}_2$ - $[\text{NBu}_4][\text{PF}_6]$  (vitreous carbon electrode;  $\nu = 0.2 \text{ Vs}^{-1}$ ; potentials are in V vs  $\text{Fc}^+/\text{Fc}$ ).

**Table S1** Average lengths and angles (Å & °) in  $\text{Fe}_2(\text{CO})_6\{\mu\text{-SCH}_2\text{N(R)CH}_2\text{S}\}$  molecules.

**Figure S7** NR Conformations. Plot of mean S-C-N-R torsion angles against deformation parameter 360-SUMN.

**Table S2** : Optimised cartesian coordinates and total energies of all species reported

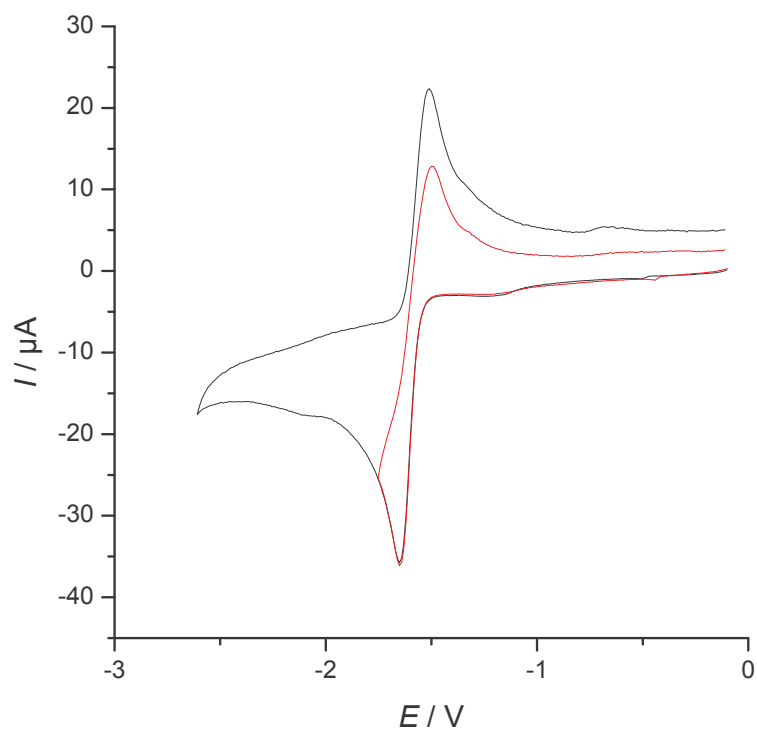

**Figure S1** : Cyclic voltammetry of  $[\text{Fe}_2(\text{CO})_6\{\mu\text{-SCH}_2\text{N}(\text{iPr})\text{CH}_2\text{S}\}]$  **1b** (1 mM) under Ar in MeCN- $[\text{NBu}_4][\text{PF}_6]$  ( $\nu = 0.2 \text{ V s}^{-1}$ ; vitreous carbon electrode; potentials are in V vs  $\text{Fc}^+/\text{Fc}$ ).

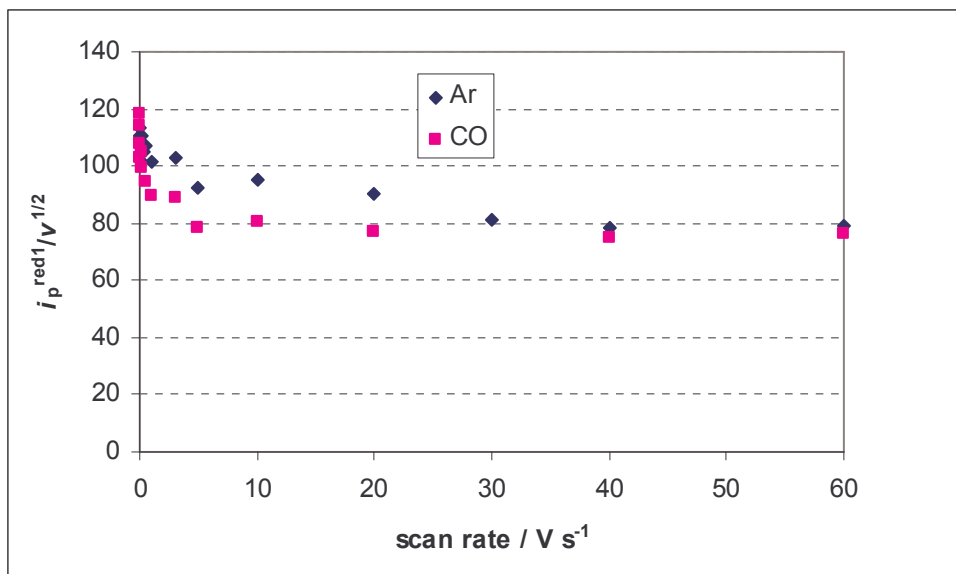

**Figure S2** : Scan rate dependence of the current function for the reduction of  $[\text{Fe}_2(\text{CO})_6\{\mu\text{-S}(\text{CH}_2)_3\text{S}\}] \mathbf{2}$  (1.4 mM) under Ar and under CO in MeCN- $[\text{NBu}_4][\text{PF}_6]$  (vitreous carbon electrode).

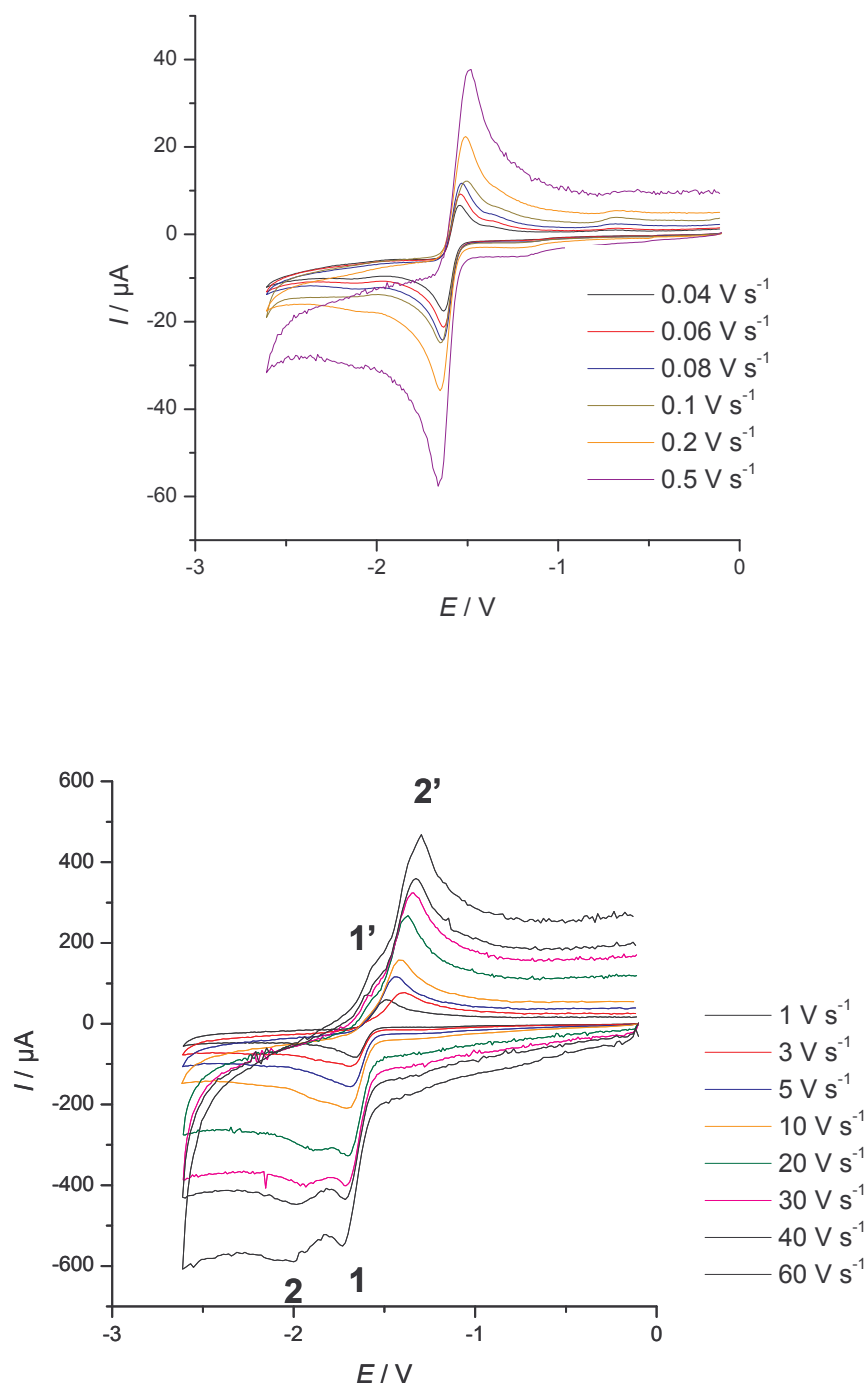

**Figure S3** : Cyclic voltammetry of  $[\text{Fe}_2(\text{CO})_6\{\mu\text{-SCH}_2\text{N}(\text{iPr})\text{CH}_2\text{S}\}]$  **1b** (1 mM) at different scan rates under Ar in  $\text{MeCN}-[\text{NBu}_4][\text{PF}_6]$  (vitreous carbon electrode; potentials are in V vs  $\text{Fc}^+/\text{Fc}$ ).

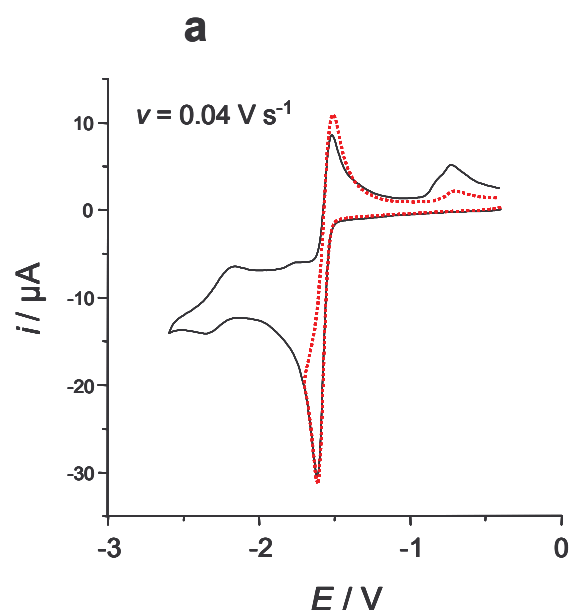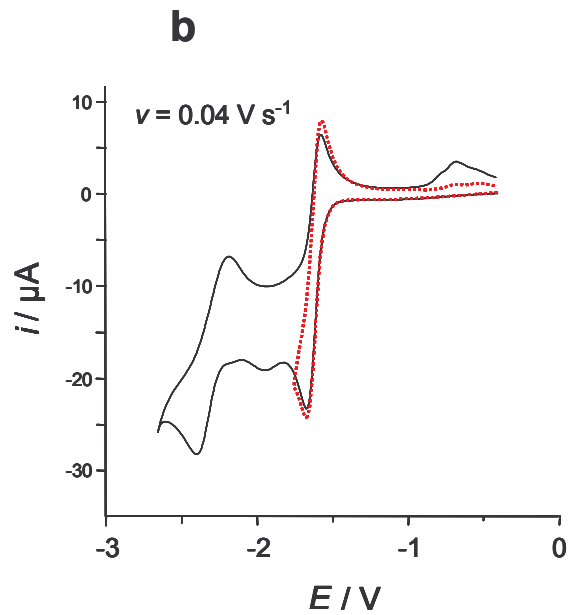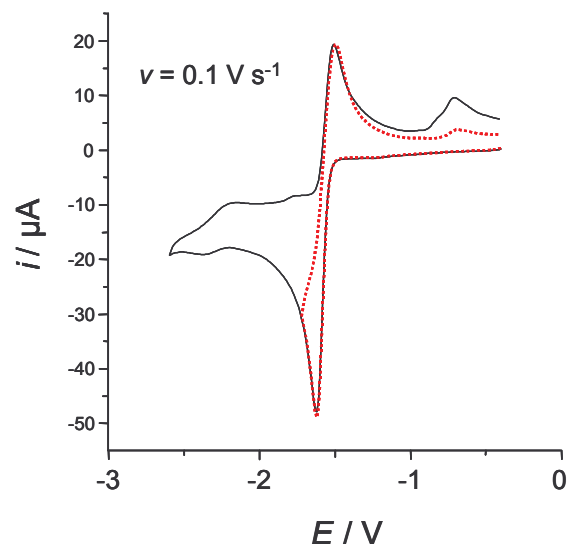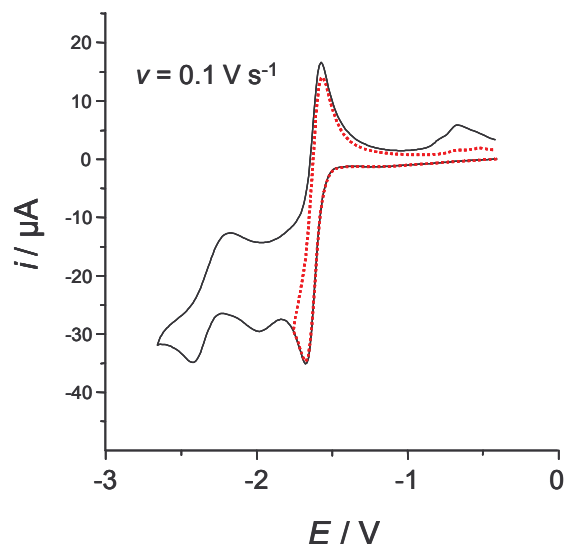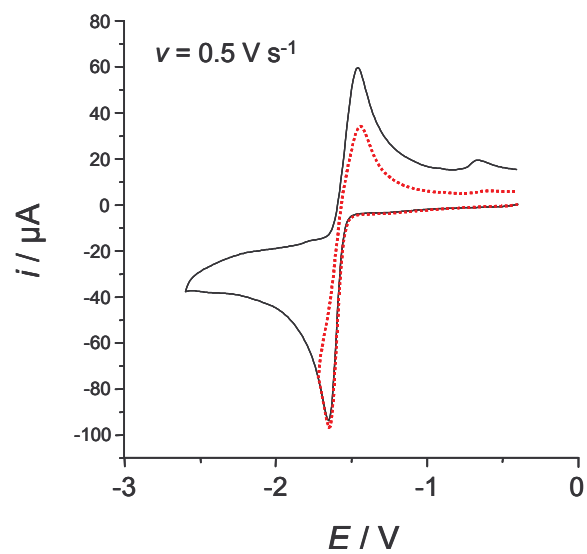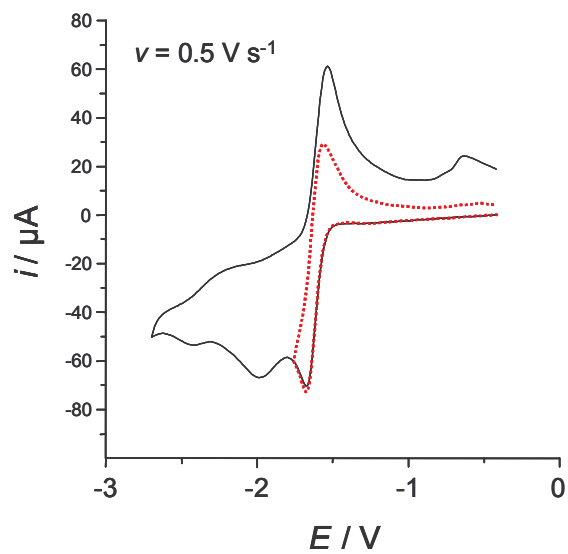

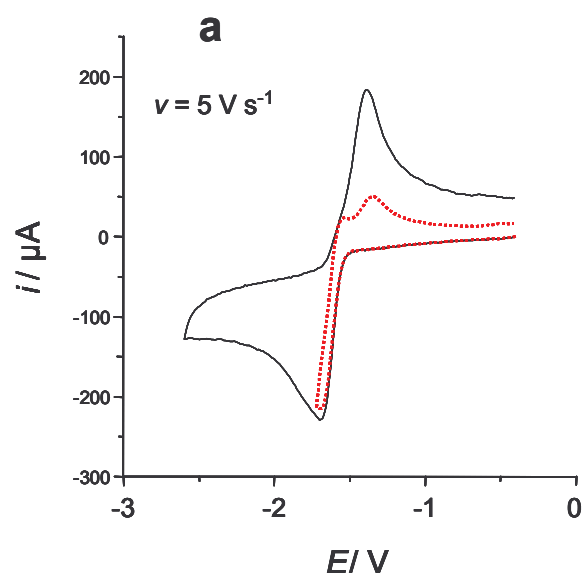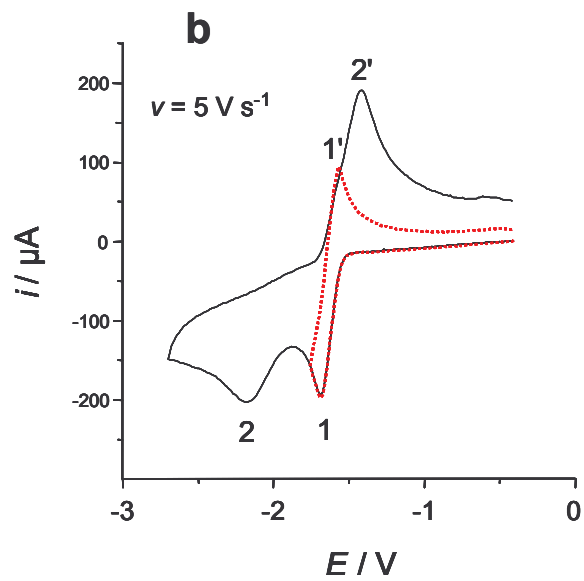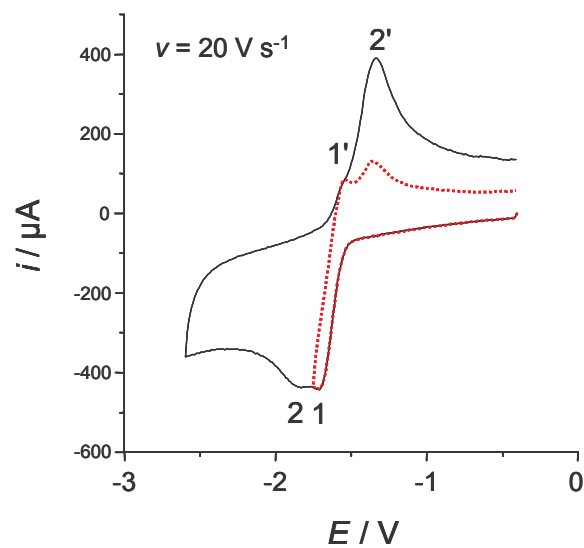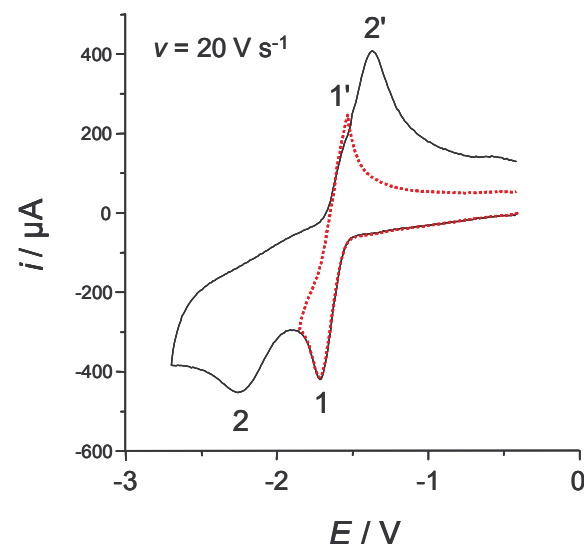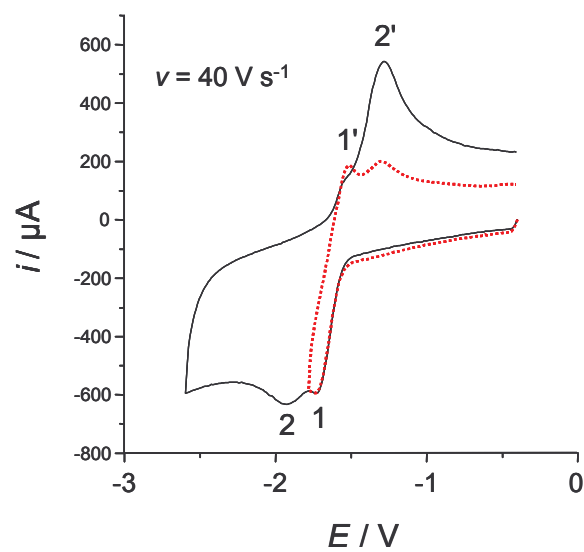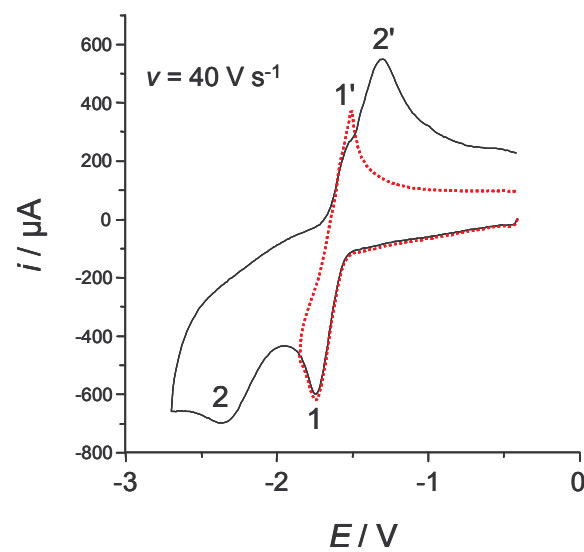

**Figure S4** : Cyclic voltammetry of complexes a) **1a** and b) **2** in MeCN-[NBu<sub>4</sub>][PF<sub>6</sub>] under CO at different scan rates (vitreous carbon electrode; potentials are in V vs Fc<sup>+</sup>/Fc).



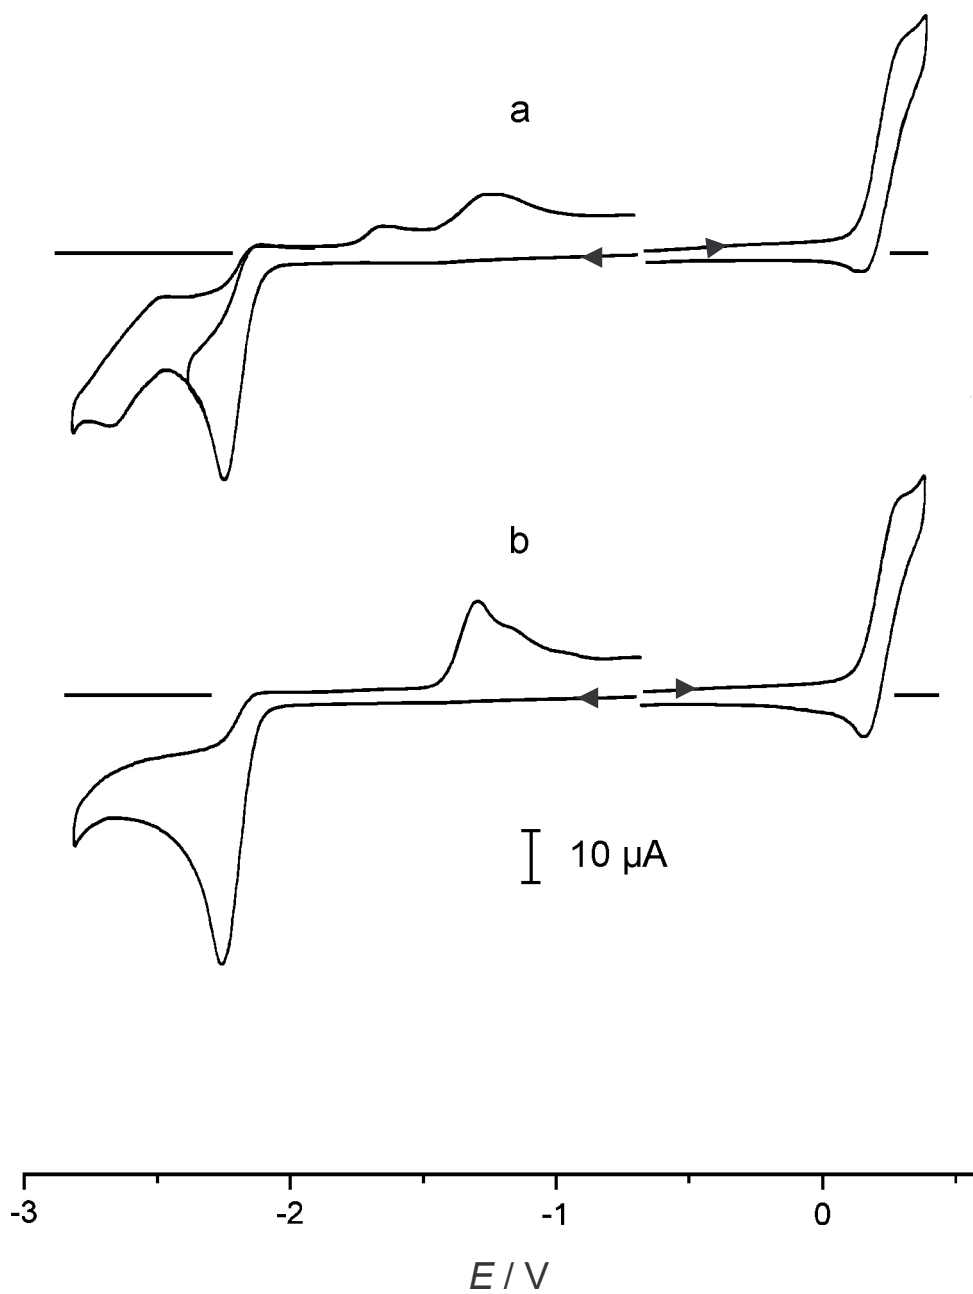

**Figure S5** : Cyclic voltammetry of **3a** (a) under Ar and (b) under CO in thf-[NBu<sub>4</sub>][PF<sub>6</sub>] (vitreous carbon electrode;  $\nu = 0.2 \text{ Vs}^{-1}$ ; potentials are in V vs Fc<sup>+</sup>/Fc).

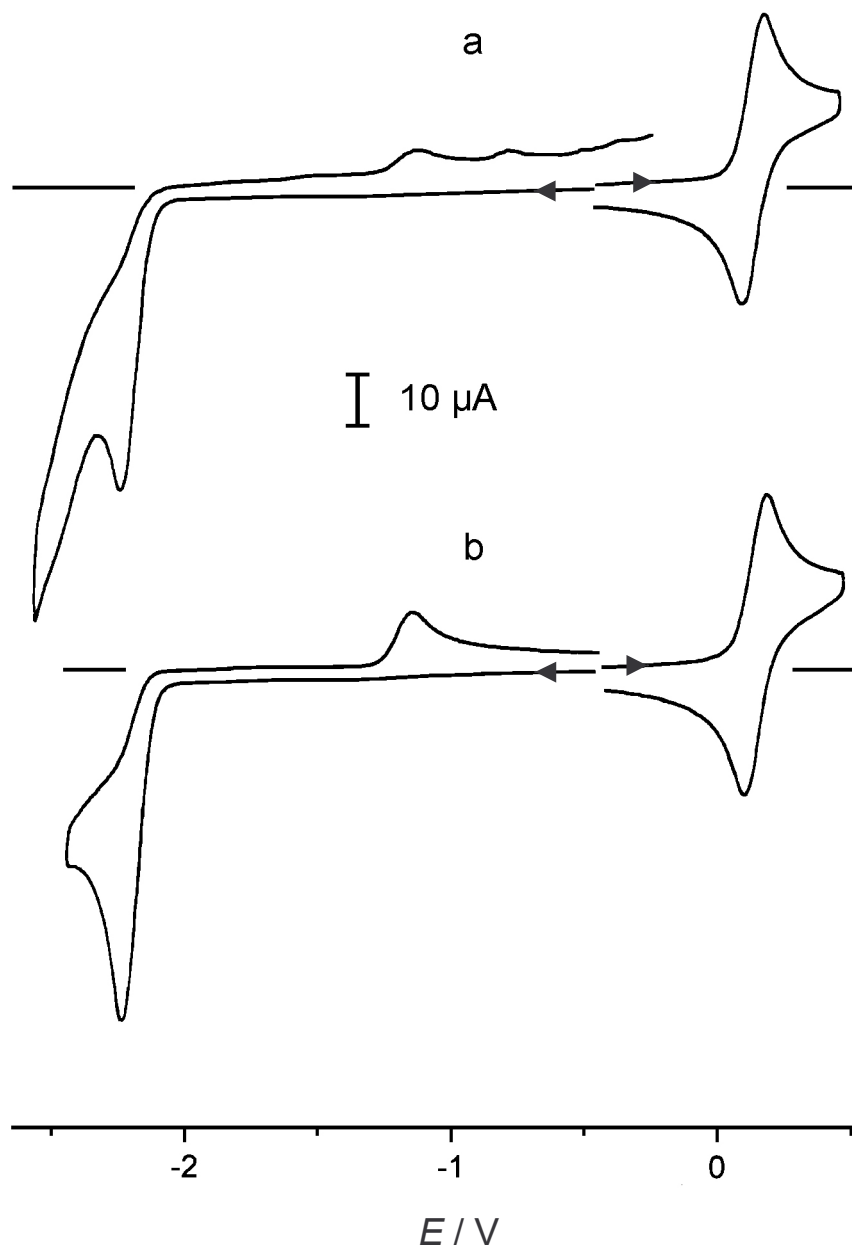

**Figure S6** : Cyclic voltammetry of **3a** (a) under Ar, and (b) under CO in  $CH_2Cl_2$ - $[NBu_4][PF_6]$  (vitreous carbon electrode;  $v = 0.2 \text{ Vs}^{-1}$ ; potentials are in V vs  $Fc^+/Fc$ ).

**Table S1 Average lengths and angles (Å & °) in Fe<sub>2</sub>(CO)<sub>6</sub>{μ-SCH<sub>2</sub>N(R)CH<sub>2</sub>S} molecules.**

- (a) **<Fe-S>**, **<S-C>** and **<N-C>** are the mean distances in the Fe-S-CH<sub>2</sub>-N-CH<sub>2</sub>-S rings.  
 (b) **N-R** is the exocyclic N-C bond length.  
 (c) **360-SUMN** is the sum of the three C-N-C bond angles subtracted from 360° and measures the departure of the central N atom from trigonal planar coordination.  
 (d) **SCNC** is the mean of the absolute values of the two S-CH<sub>2</sub>-N-R torsion angles.  
 (e) **Type** defines the axial or equatorial conformation of the N(R) substituent.  
 (f) **Hybrid.** is the hybridisation type of the C atom in the exocyclic N-C bond.  
 (g) **Δ** is the difference between the exocyclic and mean endocyclic N-C bond lengths i.e. **N-R** minus **<N-C>**.

| Ref. | Refcode        | Fe-Fe        | <>           | <S-C>        | <N-C>        | N-R          | 360-SUMN    | SCNC         | Type       | Hybrid. | Δ      |
|------|----------------|--------------|--------------|--------------|--------------|--------------|-------------|--------------|------------|---------|--------|
| 8b   | BIHHEG         | 2.500        | 2.264        | 1.854        | 1.428        | 1.387        | 2.3         | 93.2         | ax         | sp2     | -0.041 |
| 8a   | ITAJIW         | 2.508        | 2.252        | 1.827        | 1.433        | 1.477        | 19.0        | 157.8        | eq         | sp3     | 0.044  |
| 5j   | KAPXEF         | 2.533        | 2.258        | 1.865        | 1.418        | 1.462        | 2.1         | 100.9        | ax         | sp3     | 0.044  |
| 9a   | OCEQUJ         | 2.513        | 2.247        | 1.822        | 1.443        | 1.472        | 25.8        | 164.4        | eq         | sp3     | 0.029  |
| 5k   | OKACEI         | 2.499        | 2.261        | 1.855        | 1.422        | 1.404        | 4.0         | 90.9         | ax         | sp2     | -0.018 |
| 5k   | OKACIM         | 2.506        | 2.260        | 1.851        | 1.428        | 1.402        | 5.1         | 88.2         | ax         | sp      | -0.026 |
| 12b  | PEFYIJ         | 2.496        | 2.251        | 1.842        | 1.428        | 1.386        | 3.2         | 90.6         | ax         | sp2     | -0.042 |
| 12b  | PEFYOP         | 2.500        | 2.260        | 1.848        | 1.421        | 1.413        | 4.7         | 88.0         | ax         | sp2     | -0.008 |
| 5c   | QOZQOL         | 2.492        | 2.259        | 1.875        | 1.401        | 1.418        | 8.2         | 86.2         | disordered | sp3     | 0.017  |
| 8c   | SECVAY         | 2.515        | 2.248        | 1.831        | 1.428        | 1.450        | 10.1        | 146.1        | eq         | sp3     | 0.022  |
| 8c   | SECVEC         | 2.506        | 2.268        | 1.878        | 1.420        | 1.466        | 11.5        | 82.7         | ax         | sp3     | 0.047  |
| 5d   | YOBVEQ         | 2.505        | 2.266        | 1.862        | 1.429        | 1.409        | 5.0         | 88.9         | ax         | sp2     | -0.020 |
|      | This work      | 2.513        | 2.249        | 1.832        | 1.445        | 1.478        | 23.5        | 161.4        | eq         | sp3     | 0.033  |
| 8e   | 1              | 2.513        | 2.247        | 1.822        | 1.443        | 1.472        | 25.8        | 164.5        | eq         | sp3     | 0.029  |
| 8e   | 2              | 2.513        | 2.25         | 1.823        | 1.441        | 1.477        | 27.9        | 168.3        | eq         | sp3     | 0.036  |
| 8e   | 3              | 2.504        | 2.252        | 1.818        | 1.437        | 1.472        | 19.9        | 159.5        | eq         | sp3     | 0.035  |
| 9b   | 1              | 2.501        | 2.265        | 1.871        | 1.410        | 1.455        | 7.1         | 89.1         | ax         | sp3     | 0.045  |
| 9b   | 2              | 2.503        | 2.254        | 1.864        | 1.415        | 1.456        | 9.0         | 85.9         | ax         | sp3     | 0.041  |
|      | <b>Mean</b>    | <b>2.507</b> | <b>2.256</b> | <b>1.847</b> | <b>1.427</b> | <b>1.442</b> | <b>11.9</b> | <b>117.0</b> |            |         |        |
|      | <b>Maximum</b> | <b>2.533</b> | <b>2.268</b> | <b>1.878</b> | <b>1.445</b> | <b>1.478</b> | <b>27.9</b> | <b>168.3</b> |            |         |        |
|      | <b>Minimum</b> | <b>2.492</b> | <b>2.247</b> | <b>1.818</b> | <b>1.401</b> | <b>1.386</b> | <b>2.1</b>  | <b>82.7</b>  |            |         |        |

A plot of 360-SUMN versus SCNC (Figure S7 below) clearly shows that equatorial conformations are characterised by mean S-CH<sub>2</sub>-N-R torsion angles of typically 157 - 168° and pyramidal N atoms with **360-SUMN** between 19 and 26°. Axial conformations have S-CH<sub>2</sub>-N-R torsion angles of typically 83 - 101° and much flatter N coordination with **360-SUMN** between 2 and 12°. SECVAY (ref 8c) is the only exception to this classification.

Figure S7

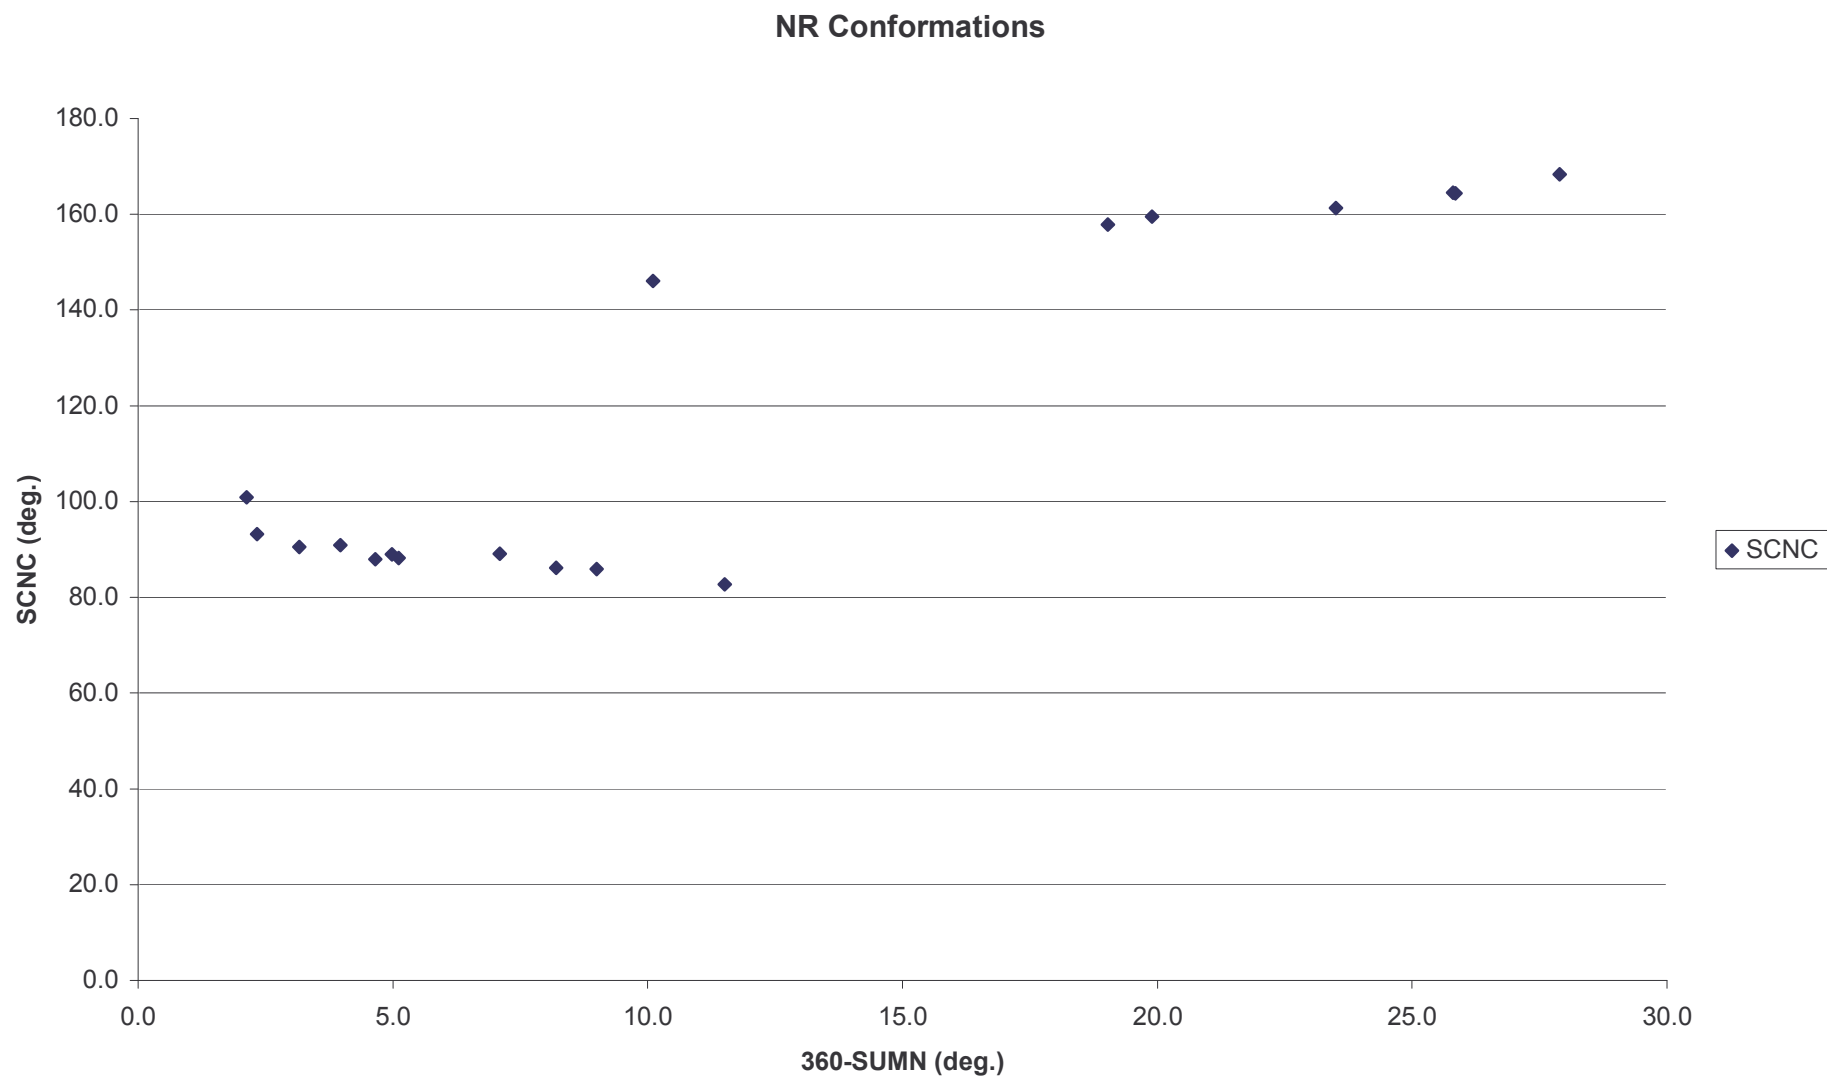



**Table S2 Optimised cartesian coordinates and total energies of all species reported:**

Fe<sub>2</sub>(CO)<sub>6</sub>(μ-SCH<sub>2</sub>{N(CH<sub>2</sub>)<sub>2</sub>OMe}CH<sub>2</sub>S) (compound **1a-A**)

E = -2051.45861834 au

|    |              |              |              |
|----|--------------|--------------|--------------|
| 26 | 1.963464000  | -0.357376000 | -0.042421000 |
| 26 | 0.133018000  | 1.354101000  | 0.171628000  |
| 16 | 0.154929000  | -0.276486000 | -1.471510000 |
| 16 | 0.389491000  | -0.409151000 | 1.642062000  |
| 6  | 2.414191000  | -2.089858000 | -0.162513000 |
| 6  | 3.151147000  | 0.196358000  | 1.200953000  |
| 6  | 2.952338000  | 0.330880000  | -1.388099000 |
| 6  | 0.575195000  | 2.539721000  | -1.112475000 |
| 6  | -1.627878000 | 1.699380000  | 0.326281000  |
| 6  | 0.779412000  | 2.422509000  | 1.471545000  |
| 8  | 1.194818000  | 3.101096000  | 2.302236000  |
| 8  | 3.903817000  | 0.547224000  | 1.996528000  |
| 8  | 3.576549000  | 0.769691000  | -2.248628000 |
| 8  | 2.683021000  | -3.206924000 | -0.239999000 |
| 8  | 0.859367000  | 3.295326000  | -1.931890000 |
| 8  | -2.745001000 | 1.955291000  | 0.428068000  |
| 6  | -0.911990000 | -1.696807000 | 1.336123000  |
| 1  | -1.527828000 | -1.687102000 | 2.238358000  |
| 1  | -0.381611000 | -2.664380000 | 1.288084000  |
| 6  | -1.062062000 | -1.615325000 | -1.064720000 |
| 1  | -0.510309000 | -2.569775000 | -1.123685000 |
| 1  | -1.787042000 | -1.591930000 | -1.880380000 |
| 7  | -1.757476000 | -1.449896000 | 0.191425000  |
| 6  | -3.048577000 | -2.156634000 | 0.232196000  |
| 1  | -3.330012000 | -2.304192000 | 1.279159000  |
| 1  | -2.990676000 | -3.158300000 | -0.225067000 |
| 6  | -4.160161000 | -1.355082000 | -0.446144000 |
| 1  | -3.897107000 | -1.111679000 | -1.490387000 |
| 1  | -4.303718000 | -0.400207000 | 0.083202000  |
| 8  | -5.327114000 | -2.147933000 | -0.402902000 |

|   |              |              |              |
|---|--------------|--------------|--------------|
| 6 | -6.449495000 | -1.506011000 | -0.970711000 |
| 1 | -6.697078000 | -0.573410000 | -0.439211000 |
| 1 | -6.285864000 | -1.265949000 | -2.033743000 |
| 1 | -7.291963000 | -2.197447000 | -0.888368000 |

$\text{Fe}_2(\text{CO})_6(\mu\text{-SCH}_2\{\text{N}(\text{CH}_2)_2\text{OMe}\}\text{CH}_2\text{S})$  (compound **1a-B**)

E = -2051.42331142 au

|    |              |              |              |
|----|--------------|--------------|--------------|
| 6  | 0.627048000  | -2.493632000 | 2.062720000  |
| 8  | 1.318515000  | -2.976806000 | 2.843310000  |
| 26 | -0.473031000 | -1.751504000 | 0.832243000  |
| 6  | -1.658080000 | -0.988471000 | 1.998133000  |
| 8  | -2.392295000 | -0.542398000 | 2.761969000  |
| 6  | 0.468656000  | -2.228329000 | -0.651416000 |
| 8  | 1.097170000  | -2.561767000 | -1.555958000 |
| 6  | -1.675682000 | -3.039030000 | 0.476908000  |
| 8  | -2.442616000 | -3.866325000 | 0.249086000  |
| 26 | -1.241908000 | 0.118677000  | -0.841058000 |
| 16 | -0.362845000 | 0.956357000  | -2.633881000 |
| 6  | 1.387633000  | 1.635481000  | -2.405019000 |
| 7  | 1.962195000  | 1.816065000  | -1.104891000 |
| 6  | 2.028668000  | 0.671179000  | -0.259715000 |
| 16 | 0.396064000  | 0.425392000  | 0.688989000  |
| 6  | -2.504912000 | -0.751347000 | -1.789235000 |
| 8  | -3.305945000 | -1.341515000 | -2.366438000 |
| 6  | -2.400791000 | 1.138598000  | 0.017691000  |
| 8  | -3.130366000 | 1.892395000  | 0.495705000  |
| 1  | 2.244141000  | -0.220696000 | -0.849631000 |
| 1  | 2.779373000  | 0.816718000  | 0.515616000  |
| 1  | 1.409784000  | 2.588104000  | -2.937492000 |
| 1  | 1.988485000  | 0.915641000  | -2.973034000 |
| 6  | 1.841318000  | 3.127997000  | -0.459026000 |
| 6  | 3.170827000  | 3.668618000  | 0.060160000  |
| 8  | 3.591292000  | 2.900516000  | 1.172592000  |
| 6  | 4.818637000  | 3.343133000  | 1.715327000  |

|   |             |             |              |
|---|-------------|-------------|--------------|
| 1 | 5.044382000 | 2.700273000 | 2.569676000  |
| 1 | 5.637787000 | 3.269328000 | 0.982559000  |
| 1 | 4.753349000 | 4.387250000 | 2.060075000  |
| 1 | 1.456334000 | 3.834972000 | -1.199747000 |
| 1 | 1.119978000 | 3.105163000 | 0.368866000  |
| 1 | 3.927875000 | 3.636583000 | -0.740886000 |
| 1 | 3.035960000 | 4.723633000 | 0.357190000  |

Fe<sub>2</sub>(CO)<sub>6</sub>(μ-SCH<sub>2</sub>{N(CH<sub>2</sub>)<sub>2</sub>OMe}CH<sub>2</sub>S) (compound **1a-C**)

E = -2051.35949648 au

|    |              |              |              |
|----|--------------|--------------|--------------|
| 6  | -0.416465000 | -2.354885000 | -1.663233000 |
| 8  | 0.015403000  | -3.120935000 | -2.400871000 |
| 26 | -1.204227000 | -1.163442000 | -0.556080000 |
| 8  | 1.926220000  | -0.786483000 | 1.357712000  |
| 6  | 3.101365000  | -1.201183000 | 0.668036000  |
| 6  | 3.203641000  | -0.468624000 | -0.664258000 |
| 7  | 3.568025000  | 0.962824000  | -0.537961000 |
| 6  | 4.918334000  | 1.364807000  | -1.069443000 |
| 16 | 6.159797000  | 0.561662000  | -0.056102000 |
| 26 | -2.008468000 | 1.151094000  | -0.123129000 |
| 6  | -2.920192000 | -1.472879000 | -0.777152000 |
| 8  | -4.026790000 | -1.706313000 | -1.005424000 |
| 16 | -0.645686000 | 0.598179000  | -1.693573000 |
| 6  | 2.808020000  | 1.788121000  | 0.095745000  |
| 6  | -1.133872000 | -2.177916000 | 0.943940000  |
| 8  | -1.041104000 | -2.803391000 | 1.902784000  |
| 6  | -3.770945000 | 1.276406000  | 0.244883000  |
| 8  | -4.905867000 | 1.342042000  | 0.408041000  |
| 6  | -1.623420000 | 0.726852000  | 1.545943000  |
| 8  | -1.319084000 | 0.535815000  | 2.644304000  |
| 6  | -1.725040000 | 2.927370000  | -0.255952000 |
| 8  | -1.489371000 | 4.050801000  | -0.283561000 |
| 1  | 1.917798000  | 1.426927000  | 0.594405000  |
| 1  | 3.108392000  | 2.828675000  | 0.158770000  |
| 1  | 4.916955000  | 1.041603000  | -2.118908000 |



|   |             |              |              |
|---|-------------|--------------|--------------|
| 1 | 4.928415000 | 2.460786000  | -1.047999000 |
| 1 | 3.994981000 | -0.935130000 | -1.251797000 |
| 1 | 2.249861000 | -0.512792000 | -1.200208000 |
| 1 | 3.061498000 | -2.283650000 | 0.464795000  |
| 1 | 4.003363000 | -0.986613000 | 1.254451000  |
| 6 | 1.923631000 | -1.199602000 | 2.719155000  |
| 1 | 2.792184000 | -0.792538000 | 3.255145000  |
| 1 | 1.005901000 | -0.816454000 | 3.168993000  |
| 1 | 1.937285000 | -2.295924000 | 2.803470000  |

[Fe<sub>2</sub>(CO)<sub>6</sub>(μ-SCH<sub>2</sub>[N(CH<sub>2</sub>)<sub>2</sub>OMe]CH<sub>2</sub>S)]<sup>-</sup> (compound **1a<sup>-</sup>A**)

E = -2051.51769699 au

|    |              |              |              |
|----|--------------|--------------|--------------|
| 26 | -1.848040000 | -0.974159000 | 0.087104000  |
| 26 | -0.399099000 | 1.433088000  | -0.036645000 |
| 16 | -0.034168000 | -0.370378000 | 1.465472000  |
| 16 | -0.431405000 | -0.267010000 | -1.666767000 |
| 6  | -1.670464000 | -2.767928000 | 0.146517000  |
| 6  | -3.196032000 | -0.816328000 | -1.061000000 |
| 6  | -2.910759000 | -0.570004000 | 1.457074000  |
| 6  | -0.900196000 | 2.395327000  | 1.373435000  |
| 6  | 1.261369000  | 2.115930000  | -0.336313000 |
| 6  | -1.463273000 | 2.372943000  | -1.116056000 |
| 8  | -2.133378000 | 3.000013000  | -1.827724000 |
| 8  | -4.070281000 | -0.736622000 | -1.821758000 |
| 8  | -3.602448000 | -0.334536000 | 2.361222000  |
| 8  | -1.678141000 | -3.928340000 | 0.240123000  |
| 8  | -1.203676000 | 3.030473000  | 2.296547000  |
| 8  | 2.269401000  | 2.650152000  | -0.555853000 |
| 6  | 1.151696000  | -1.221221000 | -1.543146000 |
| 1  | 1.715356000  | -0.985260000 | -2.450709000 |
| 1  | 0.873722000  | -2.291392000 | -1.574262000 |
| 6  | 1.426780000  | -1.334410000 | 0.866984000  |
| 1  | 1.123939000  | -2.397343000 | 0.835817000  |
| 1  | 2.193165000  | -1.224502000 | 1.638549000  |
| 7  | 1.990483000  | -0.903376000 | -0.401086000 |

|   |             |              |              |
|---|-------------|--------------|--------------|
| 6 | 3.387701000 | -1.309607000 | -0.562658000 |
| 1 | 3.634729000 | -1.300509000 | -1.629479000 |
| 1 | 3.579231000 | -2.337797000 | -0.203193000 |
| 6 | 4.338358000 | -0.344061000 | 0.145191000  |
| 1 | 4.097007000 | -0.264107000 | 1.218029000  |
| 1 | 4.232331000 | 0.661001000  | -0.288848000 |
| 8 | 5.661643000 | -0.834891000 | -0.020365000 |
| 6 | 6.623969000 | -0.000120000 | 0.575335000  |
| 1 | 6.616279000 | 1.013360000  | 0.140409000  |
| 1 | 6.467543000 | 0.096852000  | 1.663398000  |
| 1 | 7.605072000 | -0.453042000 | 0.399704000  |

[Fe<sub>2</sub>(CO)<sub>6</sub>(μ-SCH<sub>2</sub>{N(CH<sub>2</sub>)<sub>2</sub>OMe}CH<sub>2</sub>S)]<sup>-</sup> (compound **1a<sup>-</sup>B**)

E = -2051.51636115 au

|    |              |              |              |
|----|--------------|--------------|--------------|
| 6  | -0.643479000 | -2.980463000 | 1.903128000  |
| 8  | -0.487887000 | -3.594632000 | 2.875642000  |
| 26 | -0.835260000 | -2.046894000 | 0.402418000  |
| 6  | -2.403525000 | -1.005961000 | 0.647068000  |
| 8  | -3.517921000 | -0.953647000 | 1.018692000  |
| 6  | 0.522713000  | -2.258951000 | -0.769678000 |
| 8  | 1.407279000  | -2.436456000 | -1.499300000 |
| 6  | -1.816563000 | -3.263836000 | -0.434061000 |
| 8  | -2.453483000 | -4.070113000 | -0.969793000 |
| 26 | -1.120689000 | 0.351675000  | -0.439755000 |
| 16 | 0.463867000  | 1.411790000  | -1.809095000 |
| 6  | 2.177428000  | 1.046098000  | -1.181640000 |
| 7  | 2.449788000  | 1.149235000  | 0.240091000  |
| 6  | 2.061942000  | 0.016468000  | 1.018428000  |
| 16 | 0.211657000  | -0.172157000 | 1.412190000  |
| 6  | -2.149286000 | 0.236615000  | -1.882244000 |
| 8  | -2.821994000 | 0.143051000  | -2.821103000 |
| 6  | -1.989145000 | 1.720604000  | 0.362297000  |
| 8  | -2.451991000 | 2.675026000  | 0.829755000  |
| 1  | 2.399566000  | -0.897553000 | 0.527365000  |
| 1  | 2.526416000  | 0.080979000  | 2.007935000  |

|   |             |             |              |
|---|-------------|-------------|--------------|
| 1 | 2.839648000 | 1.739987000 | -1.708909000 |
| 1 | 2.454643000 | 0.034774000 | -1.489923000 |
| 6 | 2.173797000 | 2.436161000 | 0.871557000  |
| 6 | 2.806850000 | 3.626926000 | 0.167471000  |
| 8 | 4.218826000 | 3.490245000 | 0.127323000  |
| 6 | 4.841060000 | 4.565395000 | -0.528429000 |
| 1 | 5.918596000 | 4.372385000 | -0.525907000 |
| 1 | 4.501340000 | 4.665353000 | -1.573405000 |
| 1 | 4.652854000 | 5.527439000 | -0.018744000 |
| 1 | 1.092502000 | 2.640171000 | 0.927978000  |
| 1 | 2.558219000 | 2.386811000 | 1.898651000  |
| 1 | 2.399314000 | 3.733744000 | -0.849318000 |
| 1 | 2.529918000 | 4.539986000 | 0.724704000  |

[Fe<sub>2</sub>(CO)<sub>6</sub>(μ-SCH<sub>2</sub>[N(CH<sub>2</sub>)<sub>2</sub>OMe]CH<sub>2</sub>S)]<sup>-</sup> (compound **1a<sup>-</sup>C**)

E = -2051.47806287 au

|    |              |              |              |
|----|--------------|--------------|--------------|
| 6  | 0.055678000  | 2.078726000  | -1.777109000 |
| 8  | -0.747494000 | 2.622173000  | -2.420027000 |
| 26 | 1.254334000  | 1.231857000  | -0.798968000 |
| 8  | -2.969963000 | 1.780785000  | 1.298143000  |
| 6  | -4.058461000 | 1.344845000  | 0.497853000  |
| 6  | -3.531131000 | 0.516437000  | -0.665345000 |
| 7  | -3.033538000 | -0.813801000 | -0.262724000 |
| 6  | -3.807478000 | -2.001721000 | -0.774693000 |
| 16 | -5.506291000 | -1.983390000 | -0.172457000 |
| 26 | 2.531556000  | -0.722992000 | 0.344520000  |
| 6  | 3.332091000  | -0.505208000 | -1.261782000 |
| 8  | 3.851113000  | -0.381814000 | -2.290688000 |
| 16 | 0.548205000  | -0.858332000 | -0.989893000 |
| 6  | -2.009322000 | -0.937085000 | 0.512893000  |
| 6  | 2.218767000  | 2.651640000  | -0.325864000 |
| 8  | 2.850941000  | 3.576352000  | -0.011168000 |
| 6  | 3.975985000  | -0.194916000 | 1.240132000  |
| 8  | 4.917033000  | 0.135073000  | 1.828107000  |
| 6  | 1.404338000  | -0.050159000 | 1.574661000  |

|   |              |              |              |
|---|--------------|--------------|--------------|
| 8 | 0.665874000  | 0.351578000  | 2.378036000  |
| 6 | 2.556538000  | -2.489884000 | 0.637079000  |
| 8 | 2.567193000  | -3.629999000 | 0.828367000  |
| 1 | -1.564911000 | -0.066511000 | 0.971078000  |
| 1 | -1.685726000 | -1.931867000 | 0.793105000  |
| 1 | -3.735150000 | -1.929306000 | -1.869023000 |
| 1 | -3.224172000 | -2.874399000 | -0.459248000 |
| 1 | -4.359327000 | 0.335003000  | -1.352317000 |
| 1 | -2.719173000 | 1.045409000  | -1.174364000 |
| 1 | -4.600847000 | 2.214693000  | 0.088242000  |
| 1 | -4.764252000 | 0.733012000  | 1.076200000  |
| 6 | -3.382063000 | 2.442107000  | 2.473584000  |
| 1 | -4.005670000 | 1.792545000  | 3.108056000  |
| 1 | -2.477463000 | 2.718550000  | 3.021160000  |
| 1 | -3.956007000 | 3.355400000  | 2.244183000  |

[Fe<sub>2</sub>(CO)<sub>6</sub>(μ-SCH<sub>2</sub>{N(CH<sub>2</sub>)<sub>2</sub>OMe}CH<sub>2</sub>S)]<sup>2-</sup> (compound **1a<sup>2-</sup>-A**)

E = -2051.44120846 au

|    |              |              |              |
|----|--------------|--------------|--------------|
| 26 | 2.265818000  | -0.701832000 | 0.115541000  |
| 26 | -0.286912000 | 1.673976000  | 0.024269000  |
| 16 | 0.513547000  | -0.131610000 | -1.428594000 |
| 16 | 0.493886000  | 0.027991000  | 1.614280000  |
| 6  | 2.367200000  | -2.350224000 | -0.475240000 |
| 6  | 3.312963000  | -1.013231000 | 1.487474000  |
| 6  | 3.349363000  | 0.474555000  | -0.630789000 |
| 6  | -0.808589000 | 2.606170000  | -1.363820000 |
| 6  | -1.880825000 | 1.713020000  | 0.752247000  |
| 6  | 0.919060000  | 2.843452000  | 0.572918000  |
| 8  | 1.575334000  | 3.721095000  | 0.997602000  |
| 8  | 3.990812000  | -1.221906000 | 2.422041000  |
| 8  | 4.150292000  | 1.128877000  | -1.189101000 |
| 8  | 2.556324000  | -3.418203000 | -0.944462000 |
| 8  | -1.159629000 | 3.205979000  | -2.309958000 |
| 8  | -2.923833000 | 1.826865000  | 1.297166000  |
| 6  | -0.711001000 | -1.371380000 | 1.388902000  |

|   |              |              |              |
|---|--------------|--------------|--------------|
| 1 | -1.436309000 | -1.315135000 | 2.209572000  |
| 1 | -0.120674000 | -2.298078000 | 1.502392000  |
| 6 | -0.734211000 | -1.459899000 | -1.092990000 |
| 1 | -0.205237000 | -2.427838000 | -1.158122000 |
| 1 | -1.467159000 | -1.420050000 | -1.907214000 |
| 7 | -1.473523000 | -1.335620000 | 0.153701000  |
| 6 | -2.721127000 | -2.078896000 | 0.164145000  |
| 1 | -2.984204000 | -2.333585000 | 1.197885000  |
| 1 | -2.657925000 | -3.039198000 | -0.385391000 |
| 6 | -3.860633000 | -1.239719000 | -0.417642000 |
| 1 | -3.613775000 | -0.903191000 | -1.436992000 |
| 1 | -4.004382000 | -0.343076000 | 0.200442000  |
| 8 | -5.053327000 | -2.033167000 | -0.445154000 |
| 6 | -6.158162000 | -1.305264000 | -0.905906000 |
| 1 | -6.372043000 | -0.427336000 | -0.271586000 |
| 1 | -6.015515000 | -0.940491000 | -1.939272000 |
| 1 | -7.029345000 | -1.972161000 | -0.888733000 |

[Fe<sub>2</sub>(CO)<sub>6</sub>(μ-SCH<sub>2</sub>[N(CH<sub>2</sub>)<sub>2</sub>OMe]CH<sub>2</sub>S)]<sup>2-</sup> (compound **1a<sup>2-</sup>-B**)

E = -2051.45281393 au

|    |              |              |              |
|----|--------------|--------------|--------------|
| 6  | 1.985145000  | 0.185267000  | -0.767552000 |
| 8  | 1.916354000  | -0.571261000 | 0.127917000  |
| 26 | 2.125116000  | 1.233041000  | -2.173522000 |
| 6  | 0.502424000  | 2.454729000  | -1.879123000 |
| 8  | -0.592327000 | 2.284772000  | -1.418640000 |
| 6  | 3.613952000  | 0.873100000  | -3.078285000 |
| 8  | 4.590193000  | 0.563001000  | -3.652705000 |
| 6  | 1.093514000  | 0.378564000  | -3.298195000 |
| 8  | 0.406759000  | -0.219002000 | -4.037103000 |
| 26 | 1.584388000  | 3.728689000  | -2.719455000 |
| 16 | 3.269996000  | 4.759487000  | -4.262850000 |
| 6  | 4.950525000  | 4.273465000  | -3.678469000 |
| 7  | 5.274823000  | 4.466242000  | -2.258317000 |
| 6  | 4.884664000  | 3.378080000  | -1.403103000 |
| 16 | 3.053212000  | 3.089929000  | -1.006614000 |

|   |              |             |              |
|---|--------------|-------------|--------------|
| 6 | 0.585942000  | 3.694518000 | -4.166236000 |
| 8 | -0.076120000 | 3.687634000 | -5.127619000 |
| 6 | 0.948084000  | 5.189965000 | -2.024050000 |
| 8 | 0.467909000  | 6.149142000 | -1.549503000 |
| 1 | 5.269674000  | 2.446682000 | -1.821827000 |
| 1 | 5.343854000  | 3.533810000 | -0.418543000 |
| 1 | 5.675435000  | 4.854898000 | -4.264905000 |
| 1 | 5.134339000  | 3.217679000 | -3.894530000 |
| 6 | 4.946097000  | 5.774513000 | -1.706698000 |
| 6 | 5.556553000  | 6.943077000 | -2.463588000 |
| 8 | 6.983879000  | 6.920699000 | -2.387554000 |
| 6 | 7.565457000  | 7.945006000 | -3.140341000 |
| 1 | 8.654455000  | 7.851300000 | -3.048588000 |
| 1 | 7.295851000  | 7.883176000 | -4.209669000 |
| 1 | 7.270628000  | 8.951263000 | -2.782945000 |
| 1 | 3.858441000  | 5.947832000 | -1.688583000 |
| 1 | 5.308419000  | 5.800271000 | -0.668901000 |
| 1 | 5.226754000  | 6.926274000 | -3.511542000 |
| 1 | 5.183976000  | 7.883096000 | -2.015839000 |

[Fe<sub>2</sub>(CO)<sub>6</sub>(μ-SCH<sub>2</sub>{N(CH<sub>2</sub>)<sub>2</sub>OMe}CH<sub>2</sub>S)]<sup>2-</sup> (compound **1a<sup>2-</sup>-C**)

E = -2051.44603218 au

|    |              |              |              |
|----|--------------|--------------|--------------|
| 6  | 0.300831000  | 2.002085000  | -1.889268000 |
| 8  | -0.097384000 | 2.598176000  | -2.813527000 |
| 26 | 1.017684000  | 1.092774000  | -0.587710000 |
| 8  | -2.872585000 | 2.042306000  | 1.175184000  |
| 6  | -3.917600000 | 1.460947000  | 0.394787000  |
| 6  | -3.360326000 | 0.442619000  | -0.591251000 |
| 7  | -2.893506000 | -0.779035000 | 0.043091000  |
| 6  | -3.445956000 | -2.055400000 | -0.489800000 |
| 16 | -5.275845000 | -2.147925000 | -0.533711000 |
| 26 | 1.992410000  | -0.960049000 | 0.353905000  |
| 6  | 2.547811000  | 0.263647000  | -1.186088000 |
| 8  | 3.412889000  | 0.362950000  | -1.994355000 |
| 16 | -0.108729000 | -0.888658000 | -0.767547000 |

|   |              |              |              |
|---|--------------|--------------|--------------|
| 6 | -1.597113000 | -0.783915000 | 0.563380000  |
| 6 | 1.858038000  | 2.455986000  | 0.126332000  |
| 8 | 2.376699000  | 3.361889000  | 0.652247000  |
| 6 | 3.617168000  | -0.707915000 | 0.967791000  |
| 8 | 4.700694000  | -0.559401000 | 1.376711000  |
| 6 | 1.249846000  | -0.697645000 | 1.951705000  |
| 8 | 0.829072000  | -0.542504000 | 3.030477000  |
| 6 | 2.219648000  | -2.653674000 | -0.111658000 |
| 8 | 2.369221000  | -3.780983000 | -0.374795000 |
| 1 | -1.387703000 | 0.120166000  | 1.131219000  |
| 1 | -1.415798000 | -1.675393000 | 1.168467000  |
| 1 | -3.030058000 | -2.233261000 | -1.496796000 |
| 1 | -3.028654000 | -2.833496000 | 0.164241000  |
| 1 | -4.196478000 | 0.154445000  | -1.238841000 |
| 1 | -2.571805000 | 0.912569000  | -1.200656000 |
| 1 | -4.442794000 | 2.265434000  | -0.156095000 |
| 1 | -4.644327000 | 0.954625000  | 1.046753000  |
| 6 | -3.352807000 | 2.897557000  | 2.173587000  |
| 1 | -4.016907000 | 2.374133000  | 2.884288000  |
| 1 | -2.487317000 | 3.287313000  | 2.719493000  |
| 1 | -3.919129000 | 3.750381000  | 1.752845000  |

Fe<sub>2</sub>(CO)<sub>6</sub>(μ-SCH<sub>2</sub>{CH<sub>2</sub>}CH<sub>2</sub>S) (compound 2-A)

E = -1842.30104824 au

|    |              |              |              |
|----|--------------|--------------|--------------|
| 26 | -1.150089000 | -0.609425000 | 0.000000000  |
| 26 | 1.280343000  | 0.018397000  | 0.000000000  |
| 16 | -0.230394000 | 0.810933000  | -1.571508000 |
| 16 | -0.230394000 | 0.810933000  | 1.571508000  |
| 6  | -2.853209000 | -0.050514000 | 0.000000000  |
| 6  | -1.223299000 | -1.861302000 | 1.301486000  |
| 6  | -1.223299000 | -1.861302000 | -1.301486000 |
| 6  | 1.903013000  | -1.067378000 | -1.298473000 |
| 6  | 2.584534000  | 1.253074000  | 0.000000000  |
| 6  | 1.903013000  | -1.067378000 | 1.298473000  |
| 8  | 2.295788000  | -1.759379000 | 2.128702000  |

|   |              |              |              |
|---|--------------|--------------|--------------|
| 8 | -1.271336000 | -2.652779000 | 2.134335000  |
| 8 | -1.271336000 | -2.652779000 | -2.134335000 |
| 8 | -3.937677000 | 0.337671000  | 0.000000000  |
| 8 | 2.295788000  | -1.759379000 | -2.128702000 |
| 8 | 3.434125000  | 2.030524000  | 0.000000000  |
| 6 | -0.742522000 | 2.565635000  | 1.283634000  |
| 1 | -0.364330000 | 3.114098000  | 2.152171000  |
| 1 | -1.836896000 | 2.579792000  | 1.335953000  |
| 6 | -0.742522000 | 2.565635000  | -1.283634000 |
| 1 | -1.836896000 | 2.579792000  | -1.335953000 |
| 1 | -0.364330000 | 3.114098000  | -2.152171000 |
| 6 | -0.250672000 | 3.224398000  | 0.000000000  |
| 1 | -0.601286000 | 4.267022000  | 0.000000000  |
| 1 | 0.843361000  | 3.267667000  | 0.000000000  |

Fe<sub>2</sub>(CO)<sub>6</sub>(μ-SCH<sub>2</sub>{CH<sub>2</sub>}CH<sub>2</sub>S) (compound **2-B**)

E = -1842.26007560 au

|    |              |              |              |
|----|--------------|--------------|--------------|
| 26 | 0.045956000  | -1.329059000 | 0.776244000  |
| 6  | 1.173015000  | -2.292093000 | 1.816169000  |
| 8  | 1.884234000  | -2.910395000 | 2.473400000  |
| 6  | 0.777394000  | -1.736200000 | -0.841944000 |
| 8  | 1.264366000  | -2.045417000 | -1.837219000 |
| 8  | -2.921033000 | -0.299729000 | -2.142155000 |
| 6  | -1.299430000 | -2.471764000 | 0.424981000  |
| 8  | -2.156467000 | -3.204965000 | 0.198763000  |
| 6  | -2.025209000 | 0.146810000  | -1.576113000 |
| 26 | -0.619506000 | 0.782294000  | -0.637001000 |
| 16 | 1.131750000  | 0.745864000  | 0.783632000  |
| 6  | -1.618428000 | 1.803161000  | 0.406590000  |
| 8  | -2.241389000 | 2.561087000  | 1.011016000  |
| 6  | -0.973163000 | -0.594383000 | 2.105891000  |
| 8  | -1.616075000 | -0.173615000 | 2.960567000  |
| 16 | 0.234244000  | 1.730827000  | -2.377158000 |
| 6  | 2.667172000  | 0.881669000  | -0.227741000 |
| 1  | 2.717201000  | 0.093517000  | -0.983324000 |



|   |             |             |              |
|---|-------------|-------------|--------------|
| 1 | 3.504543000 | 0.754719000 | 0.464509000  |
| 6 | 1.950169000 | 2.402788000 | -2.199091000 |
| 1 | 1.896043000 | 3.458325000 | -2.484985000 |
| 1 | 2.513162000 | 1.888427000 | -2.987716000 |
| 6 | 2.698302000 | 2.277460000 | -0.868382000 |
| 1 | 2.317093000 | 3.014136000 | -0.150703000 |
| 1 | 3.746565000 | 2.548604000 | -1.058863000 |

Fe<sub>2</sub>(CO)<sub>6</sub>(μ-SCH<sub>2</sub>{CH<sub>2</sub>}CH<sub>2</sub>S) (compound **2-C**)

E = -1842.14867080 au

|    |              |              |              |
|----|--------------|--------------|--------------|
| 6  | 0.704985000  | 1.478058000  | -2.757455000 |
| 26 | -0.102779000 | 2.842238000  | -3.620168000 |
| 6  | 1.143827000  | 2.992513000  | -4.929900000 |
| 8  | 1.935453000  | 3.081631000  | -5.757080000 |
| 8  | 1.235988000  | 0.664838000  | -2.143156000 |
| 26 | -1.923213000 | 4.512737000  | -3.847795000 |
| 6  | -3.662604000 | 4.999965000  | -3.878377000 |
| 8  | -4.771215000 | 5.279107000  | -3.985572000 |
| 6  | 0.409443000  | 4.298626000  | -2.769097000 |
| 8  | 0.873646000  | 5.161009000  | -2.150842000 |
| 16 | -2.073045000 | 2.692838000  | -2.474599000 |
| 6  | -2.973258000 | 1.213912000  | -3.196154000 |
| 6  | -4.261099000 | 0.900045000  | -2.424678000 |
| 6  | -5.386280000 | 1.913084000  | -2.663371000 |
| 16 | -6.915886000 | 1.446086000  | -1.815688000 |
| 1  | -4.050828000 | 0.825171000  | -1.352111000 |
| 6  | -1.294673000 | 6.089271000  | -4.488938000 |
| 8  | -0.887865000 | 7.087220000  | -4.884068000 |
| 6  | -1.662060000 | 3.631969000  | -5.348357000 |
| 8  | -1.695259000 | 3.128608000  | -6.394322000 |
| 1  | -2.270553000 | 0.376613000  | -3.128403000 |
| 1  | -3.170409000 | 1.413011000  | -4.252759000 |
| 1  | -5.090169000 | 2.904666000  | -2.286372000 |
| 1  | -5.568715000 | 2.033933000  | -3.740824000 |
| 1  | -4.599884000 | -0.094879000 | -2.745680000 |

[Fe<sub>2</sub>(CO)<sub>6</sub>(μ-SCH<sub>2</sub>{CH<sub>2</sub>}CH<sub>2</sub>S)]<sup>-</sup> (compound **2-A**)

E = -1842.35964817 au

|    |              |              |              |
|----|--------------|--------------|--------------|
| 26 | -0.265518000 | -1.410253000 | 0.095914000  |
| 26 | -0.321935000 | 1.390430000  | -0.077872000 |
| 16 | 0.777063000  | 0.116438000  | 1.583248000  |
| 16 | 0.735715000  | -0.116594000 | -1.600823000 |
| 6  | 0.846532000  | -2.826806000 | -0.023464000 |
| 6  | -1.593274000 | -1.726865000 | -1.055462000 |
| 6  | -1.255997000 | -1.936047000 | 1.477909000  |
| 6  | -1.732669000 | 1.449556000  | 1.018390000  |
| 6  | 0.598174000  | 2.918946000  | 0.173576000  |
| 6  | -1.293455000 | 1.933341000  | -1.462329000 |
| 8  | -1.908643000 | 2.299259000  | -2.376050000 |
| 8  | -2.443725000 | -1.956617000 | -1.813063000 |
| 8  | -1.878897000 | -2.298949000 | 2.387813000  |
| 8  | 1.486109000  | -3.789866000 | -0.158411000 |
| 8  | -2.642025000 | 1.532297000  | 1.737645000  |
| 8  | 1.089805000  | 3.944312000  | 0.424996000  |
| 6  | 2.563721000  | -0.163667000 | -1.316515000 |
| 1  | 3.018949000  | 0.260419000  | -2.219696000 |
| 1  | 2.855704000  | -1.219770000 | -1.263880000 |
| 6  | 2.599419000  | 0.064331000  | 1.257217000  |
| 1  | 2.907105000  | -0.980969000 | 1.385659000  |
| 1  | 3.069004000  | 0.647897000  | 2.058359000  |
| 6  | 3.081247000  | 0.592078000  | -0.094087000 |
| 1  | 4.182960000  | 0.537956000  | -0.101699000 |
| 1  | 2.819272000  | 1.650965000  | -0.187373000 |

[Fe<sub>2</sub>(CO)<sub>6</sub>(μ-SCH<sub>2</sub>{CH<sub>2</sub>}CH<sub>2</sub>S)]<sup>-</sup> (compound **2-B**)

E = -1842.35202178 au

|    |             |              |              |
|----|-------------|--------------|--------------|
| 26 | 0.164404000 | -1.473152000 | 0.590378000  |
| 6  | 0.995745000 | -2.181655000 | 1.990170000  |
| 8  | 1.565277000 | -2.653824000 | 2.885454000  |
| 6  | 1.000424000 | -1.785388000 | -0.983279000 |

|    |              |              |              |
|----|--------------|--------------|--------------|
| 8  | 1.561467000  | -2.028383000 | -1.968178000 |
| 8  | -3.200486000 | 0.140501000  | -1.668952000 |
| 6  | -0.936814000 | -2.838191000 | 0.332321000  |
| 8  | -1.647316000 | -3.740051000 | 0.172860000  |
| 6  | -2.215222000 | 0.411307000  | -1.123125000 |
| 26 | -0.706357000 | 0.790081000  | -0.259331000 |
| 16 | 1.283159000  | 0.578047000  | 0.898071000  |
| 6  | -1.314653000 | 2.203128000  | 0.693488000  |
| 8  | -1.647621000 | 3.186888000  | 1.207499000  |
| 6  | -1.306917000 | -0.497750000 | 1.322018000  |
| 8  | -2.191277000 | -0.501117000 | 2.100290000  |
| 16 | 0.079346000  | 1.679272000  | -2.247869000 |
| 6  | 2.708123000  | 0.880855000  | -0.230523000 |
| 1  | 2.781896000  | 0.088215000  | -0.979311000 |
| 1  | 3.600036000  | 0.831506000  | 0.403933000  |
| 6  | 1.842561000  | 2.240623000  | -2.236261000 |
| 1  | 1.852123000  | 3.255327000  | -2.653527000 |
| 1  | 2.386591000  | 1.600837000  | -2.944288000 |
| 6  | 2.607733000  | 2.254034000  | -0.911441000 |
| 1  | 2.159117000  | 2.979066000  | -0.220131000 |
| 1  | 3.629171000  | 2.611892000  | -1.120898000 |

[Fe<sub>2</sub>(CO)<sub>6</sub>(μ-SCH<sub>2</sub>{CH<sub>2</sub>}CH<sub>2</sub>S)]<sup>-</sup> (compound **2<sup>-</sup>C**)

E = -1842.29130535 au

|    |              |             |              |
|----|--------------|-------------|--------------|
| 6  | 0.236219000  | 1.818331000 | -2.028244000 |
| 26 | -0.333479000 | 2.820371000 | -3.352340000 |
| 6  | 1.147813000  | 2.691475000 | -4.304326000 |
| 8  | 2.092386000  | 2.578665000 | -4.970746000 |
| 8  | 0.632675000  | 1.221315000 | -1.112126000 |
| 26 | -1.669782000 | 4.662895000 | -4.242722000 |
| 6  | -2.974718000 | 5.794495000 | -3.807137000 |
| 8  | -3.858020000 | 6.508321000 | -3.562336000 |
| 6  | -0.094338000 | 4.613741000 | -2.911169000 |
| 8  | 0.586282000  | 5.354886000 | -2.297931000 |
| 16 | -2.558542000 | 3.020912000 | -2.789707000 |

|    |              |              |              |
|----|--------------|--------------|--------------|
| 6  | -3.367344000 | 1.651102000  | -3.752482000 |
| 6  | -4.075533000 | 0.641144000  | -2.839846000 |
| 6  | -5.300336000 | 1.221227000  | -2.123019000 |
| 16 | -6.209625000 | 0.024026000  | -1.093275000 |
| 1  | -3.371431000 | 0.246934000  | -2.097535000 |
| 6  | -0.727395000 | 5.870571000  | -5.126421000 |
| 8  | -0.119948000 | 6.670199000  | -5.707337000 |
| 6  | -1.920596000 | 3.665404000  | -5.691946000 |
| 8  | -2.106147000 | 3.046554000  | -6.661624000 |
| 1  | -2.604853000 | 1.143965000  | -4.352968000 |
| 1  | -4.077736000 | 2.111284000  | -4.448727000 |
| 1  | -4.992622000 | 2.040821000  | -1.458416000 |
| 1  | -5.995914000 | 1.665763000  | -2.848144000 |
| 1  | -4.393468000 | -0.212133000 | -3.455239000 |

[Fe<sub>2</sub>(CO)<sub>6</sub>(μ-SCH<sub>2</sub>{CH<sub>2</sub>}CH<sub>2</sub>S)]<sup>2-</sup> (compound **2<sup>2-</sup>-A**)

E = -1842.28168760 au

|    |              |              |              |
|----|--------------|--------------|--------------|
| 26 | -0.273671000 | -1.749903000 | 0.182474000  |
| 26 | -0.279721000 | 1.724116000  | -0.194372000 |
| 16 | 0.482939000  | 0.162394000  | 1.483847000  |
| 16 | 0.364347000  | -0.211405000 | -1.557924000 |
| 6  | 0.847054000  | -2.978789000 | -0.370464000 |
| 6  | -1.917565000 | -1.834468000 | -0.454069000 |
| 6  | -0.654759000 | -2.601563000 | 1.666973000  |
| 6  | -1.978062000 | 1.597351000  | 0.289747000  |
| 6  | 0.580725000  | 3.035107000  | 0.585279000  |
| 6  | -0.504397000 | 2.668225000  | -1.653984000 |
| 8  | -0.639812000 | 3.282224000  | -2.646300000 |
| 8  | -2.972297000 | -2.047221000 | -0.928423000 |
| 8  | -0.891910000 | -3.152940000 | 2.675575000  |
| 8  | 1.491544000  | -3.873439000 | -0.797725000 |
| 8  | -3.089564000 | 1.725953000  | 0.645668000  |
| 8  | 1.055583000  | 3.949942000  | 1.164406000  |
| 6  | 2.214308000  | -0.228454000 | -1.424020000 |
| 1  | 2.609502000  | 0.259197000  | -2.327181000 |

|   |             |              |              |
|---|-------------|--------------|--------------|
| 1 | 2.530848000 | -1.277320000 | -1.447071000 |
| 6 | 2.315542000 | 0.049098000  | 1.183511000  |
| 1 | 2.595442000 | -0.992348000 | 1.380366000  |
| 1 | 2.815369000 | 0.681229000  | 1.932232000  |
| 6 | 2.802534000 | 0.490196000  | -0.203511000 |
| 1 | 3.902077000 | 0.368218000  | -0.232456000 |
| 1 | 2.592122000 | 1.559606000  | -0.310102000 |

[Fe<sub>2</sub>(CO)<sub>6</sub>(μ-SCH<sub>2</sub>{CH<sub>2</sub>}CH<sub>2</sub>S)]<sup>2-</sup> (compound **2<sup>2-</sup>-B**)

E = -1842.28358172 au

|    |              |              |              |
|----|--------------|--------------|--------------|
| 26 | 3.128172000  | 0.551641000  | -0.544037000 |
| 6  | 3.744404000  | -0.326608000 | 0.848491000  |
| 8  | 4.174248000  | -0.970078000 | 1.732899000  |
| 6  | 4.184421000  | 0.318849000  | -1.956537000 |
| 8  | 4.900852000  | 0.096185000  | -2.860290000 |
| 8  | -0.472560000 | 2.314366000  | -2.457549000 |
| 6  | 1.913649000  | -0.572234000 | -1.109491000 |
| 8  | 1.115033000  | -1.349914000 | -1.474707000 |
| 6  | 0.504889000  | 2.526347000  | -1.855203000 |
| 26 | 1.972767000  | 2.868516000  | -0.949013000 |
| 16 | 4.072555000  | 2.651810000  | 0.048469000  |
| 6  | 1.424617000  | 4.297852000  | -0.123969000 |
| 8  | 1.025476000  | 5.236917000  | 0.453214000  |
| 6  | 1.551550000  | 1.551332000  | 0.314444000  |
| 8  | 0.768669000  | 1.273061000  | 1.180972000  |
| 16 | 2.684343000  | 3.970292000  | -3.065434000 |
| 6  | 5.535758000  | 3.118895000  | -0.993747000 |
| 1  | 5.923724000  | 2.209888000  | -1.464153000 |
| 1  | 6.292074000  | 3.457472000  | -0.272200000 |
| 6  | 4.500377000  | 3.787802000  | -3.273527000 |
| 1  | 4.780532000  | 4.424091000  | -4.126393000 |
| 1  | 4.754253000  | 2.756618000  | -3.550912000 |
| 6  | 5.350092000  | 4.202361000  | -2.061006000 |
| 1  | 4.922756000  | 5.109442000  | -1.613365000 |
| 1  | 6.366463000  | 4.466428000  | -2.412665000 |

[Fe<sub>2</sub>(CO)<sub>6</sub>(μ-SCH<sub>2</sub>{CH<sub>2</sub>}CH<sub>2</sub>S)]<sup>2-</sup> (compound **2<sup>2-</sup>-C**)

E = -1842.27689845 au

|    |              |              |              |
|----|--------------|--------------|--------------|
| 6  | 0.315875000  | 1.860986000  | -2.046746000 |
| 26 | -0.292359000 | 2.850883000  | -3.348494000 |
| 6  | 1.141791000  | 2.707977000  | -4.347856000 |
| 8  | 2.065861000  | 2.578636000  | -5.050681000 |
| 8  | 0.771553000  | 1.275441000  | -1.143917000 |
| 26 | -1.647959000 | 4.675842000  | -4.247177000 |
| 6  | -2.884200000 | 5.839003000  | -3.734755000 |
| 8  | -3.715085000 | 6.603925000  | -3.444943000 |
| 6  | -0.043114000 | 4.626326000  | -2.951123000 |
| 8  | 0.650883000  | 5.376609000  | -2.349301000 |
| 16 | -2.501118000 | 3.048759000  | -2.736532000 |
| 6  | -3.316505000 | 1.636929000  | -3.646131000 |
| 6  | -4.081805000 | 0.657753000  | -2.735780000 |
| 6  | -5.437426000 | 1.156209000  | -2.205349000 |
| 16 | -6.426216000 | -0.154469000 | -1.361206000 |
| 1  | -3.449026000 | 0.347497000  | -1.894005000 |
| 6  | -0.696158000 | 5.829431000  | -5.170119000 |
| 8  | -0.078099000 | 6.605246000  | -5.784106000 |
| 6  | -2.057477000 | 3.708232000  | -5.680125000 |
| 8  | -2.325507000 | 3.123522000  | -6.654779000 |
| 1  | -2.529196000 | 1.114116000  | -4.203497000 |
| 1  | -3.994155000 | 2.085861000  | -4.381601000 |
| 1  | -5.258251000 | 2.005472000  | -1.528431000 |
| 1  | -5.999615000 | 1.564074000  | -3.063507000 |
| 1  | -4.269145000 | -0.251989000 | -3.325602000 |

Fe<sub>2</sub>(CO)<sub>5</sub>(μ-SCH<sub>2</sub>{N(CH<sub>2</sub>)<sub>2</sub>OMe}CH<sub>2</sub>S) (compound **1a-CO**)

E = -1938.11169725 au

|    |              |              |              |
|----|--------------|--------------|--------------|
| 6  | -2.478198000 | -0.786230000 | -1.204124000 |
| 26 | -1.608085000 | 0.181566000  | 0.038132000  |
| 6  | -2.624734000 | 1.663585000  | 0.059118000  |
| 8  | -3.257831000 | 2.627061000  | 0.075439000  |

|    |              |              |              |
|----|--------------|--------------|--------------|
| 8  | -3.030593000 | -1.404140000 | -2.003452000 |
| 6  | -2.341407000 | -0.760021000 | 1.384836000  |
| 8  | -2.804379000 | -1.364560000 | 2.248838000  |
| 26 | 0.661851000  | -0.819610000 | -0.038859000 |
| 6  | 0.481915000  | -2.090797000 | -1.280334000 |
| 8  | 0.325804000  | -2.914285000 | -2.074481000 |
| 16 | 0.057719000  | 0.792123000  | 1.560711000  |
| 6  | 0.773854000  | 2.466650000  | 1.084175000  |
| 7  | 1.501697000  | 2.527554000  | -0.143334000 |
| 6  | 2.886137000  | 2.078501000  | -0.136065000 |
| 6  | 3.262360000  | 0.727411000  | 0.486710000  |
| 8  | 2.739237000  | -0.397016000 | -0.249450000 |
| 6  | 3.600701000  | -1.543063000 | -0.181117000 |
| 16 | -0.076496000 | 0.695226000  | -1.648773000 |
| 6  | 0.720271000  | 2.364585000  | -1.330911000 |
| 6  | 0.657219000  | -2.009219000 | 1.294378000  |
| 8  | 0.614275000  | -2.780263000 | 2.153244000  |
| 1  | 4.605629000  | -1.267956000 | -0.522648000 |
| 1  | 3.184422000  | -2.297812000 | -0.847382000 |
| 1  | 3.650678000  | -1.935859000 | 0.842081000  |
| 1  | -0.066731000 | 3.166999000  | 1.050627000  |
| 1  | 1.427587000  | 2.749451000  | 1.915079000  |
| 1  | 3.481244000  | 2.816455000  | 0.426229000  |
| 1  | 3.248589000  | 2.098773000  | -1.168829000 |
| 1  | 1.347542000  | 2.550036000  | -2.206579000 |
| 1  | -0.095064000 | 3.096130000  | -1.327763000 |
| 1  | 2.937899000  | 0.651068000  | 1.530551000  |
| 1  | 4.358611000  | 0.666155000  | 0.463527000  |

$\text{Fe}_2(\text{CO})_6(\mu\text{-SCH}_2\{\text{N}(\text{CH}_2)_2\text{SMe}\}\text{CH}_2\text{S})$  (compound **1aS**)

E = -2374.44073499 au

|    |              |              |             |
|----|--------------|--------------|-------------|
| 6  | -1.961440000 | -2.681491000 | 0.163179000 |
| 8  | -1.905863000 | -3.831464000 | 0.183675000 |
| 26 | -2.014322000 | -0.888233000 | 0.128862000 |
| 6  | -3.051704000 | -0.565124000 | 1.571919000 |

|    |              |              |              |
|----|--------------|--------------|--------------|
| 8  | -3.706993000 | -0.357638000 | 2.493925000  |
| 26 | -0.744975000 | 1.273020000  | -0.081950000 |
| 6  | -1.755723000 | 2.178251000  | -1.268847000 |
| 8  | -2.402641000 | 2.752259000  | -2.027114000 |
| 16 | -0.196393000 | -0.372574000 | 1.451107000  |
| 6  | 1.308864000  | -1.297308000 | 0.887113000  |
| 7  | 1.835052000  | -0.885076000 | -0.394103000 |
| 6  | 3.266493000  | -1.199030000 | -0.560482000 |
| 6  | 4.158726000  | -0.165626000 | 0.135295000  |
| 16 | 5.919898000  | -0.636993000 | -0.086675000 |
| 6  | 6.712569000  | 0.795862000  | 0.721749000  |
| 16 | -0.617212000 | -0.422676000 | -1.645417000 |
| 6  | 1.007894000  | -1.307916000 | -1.500770000 |
| 6  | -3.397874000 | -0.631707000 | -1.004326000 |
| 8  | -4.274945000 | -0.469019000 | -1.730040000 |
| 6  | -1.395859000 | 2.230004000  | 1.300481000  |
| 8  | -1.812381000 | 2.839067000  | 2.182859000  |
| 6  | 0.838009000  | 2.098196000  | -0.319332000 |
| 8  | 1.833011000  | 2.655933000  | -0.470856000 |
| 1  | 1.527758000  | -1.085353000 | -2.435573000 |
| 1  | 0.770749000  | -2.386397000 | -1.483670000 |
| 1  | 1.048563000  | -2.369742000 | 0.915864000  |
| 1  | 2.057419000  | -1.109342000 | 1.659008000  |
| 1  | 3.489660000  | -1.185144000 | -1.631764000 |
| 1  | 3.504095000  | -2.214477000 | -0.199703000 |
| 1  | 3.939050000  | -0.108767000 | 1.207561000  |
| 1  | 3.979390000  | 0.821533000  | -0.301426000 |
| 1  | 6.458737000  | 1.729204000  | 0.210270000  |
| 1  | 6.429363000  | 0.863675000  | 1.776663000  |
| 1  | 7.792443000  | 0.639646000  | 0.656665000  |

Fe<sub>2</sub>(CO)<sub>5</sub>(μ-SCH<sub>2</sub>{N(CH<sub>2</sub>)<sub>2</sub>SMe}CH<sub>2</sub>S) (compound **1aS-CO**)

E = -2261.10631876 au

|   |              |              |              |
|---|--------------|--------------|--------------|
| 6 | -2.635935000 | -0.798354000 | -1.167318000 |
| 8 | -3.209807000 | -1.392476000 | -1.969591000 |



|    |              |              |              |
|----|--------------|--------------|--------------|
| 26 | -1.737356000 | 0.138616000  | 0.079731000  |
| 6  | -2.382175000 | -0.884609000 | 1.411172000  |
| 8  | -2.788944000 | -1.539976000 | 2.266817000  |
| 26 | 0.555459000  | -0.815517000 | -0.102833000 |
| 16 | -0.031295000 | 0.744558000  | 1.551174000  |
| 6  | 0.553332000  | 2.482512000  | 1.112119000  |
| 7  | 1.247638000  | 2.637519000  | -0.124306000 |
| 6  | 0.469369000  | 2.438389000  | -1.306578000 |
| 16 | -0.267756000 | 0.735428000  | -1.630452000 |
| 6  | -2.790231000 | 1.586968000  | 0.202180000  |
| 8  | -3.452215000 | 2.527617000  | 0.288508000  |
| 6  | 0.661254000  | -2.019723000 | 1.209158000  |
| 8  | 0.721843000  | -2.796019000 | 2.062483000  |
| 16 | 2.783020000  | -0.369163000 | -0.517771000 |
| 6  | 3.256191000  | 1.122213000  | 0.447502000  |
| 6  | 2.686192000  | 2.429374000  | -0.137126000 |
| 6  | 0.323747000  | -2.076220000 | -1.345830000 |
| 8  | 0.148856000  | -2.897350000 | -2.138036000 |
| 6  | 3.826212000  | -1.601831000 | 0.342911000  |
| 1  | 4.881655000  | -1.349915000 | 0.206952000  |
| 1  | 3.624620000  | -2.570821000 | -0.119762000 |
| 1  | 3.579156000  | -1.650521000 | 1.406465000  |
| 1  | -0.342789000 | 3.111944000  | 1.119388000  |
| 1  | 1.199430000  | 2.791873000  | 1.939004000  |
| 1  | 3.154603000  | 3.238137000  | 0.444989000  |
| 1  | 3.031390000  | 2.547283000  | -1.169339000 |
| 1  | 1.079960000  | 2.656144000  | -2.186251000 |
| 1  | -0.386416000 | 3.123306000  | -1.300127000 |
| 1  | 2.940180000  | 0.977968000  | 1.484835000  |
| 1  | 4.350912000  | 1.187971000  | 0.423585000  |
